# Supplementary material for: Dynamic changes in cerebral and peripheral markers of glutamatergic signaling across the human sleep–wake cycle
Source: PubMed Central journal article supplement — Sleep. 2019 Jul 13;42(11):zsz161. doi: 10.1093/sleep/zsz161 (PMC6802568; doi:10.1093/sleep/zsz161), 2019-07-13
Supplement: zsz161_suppl_supplementary_material.pdf [file zsz161_suppl_supplementary_material.pdf]

# Dynamic changes in cerebral and peripheral markers of glutamatergic signaling across the human sleep-wake cycle

Susanne Weigend,<sup>1,2</sup> Sebastian C. Holst,<sup>1,2\*</sup> Valérie Treyer,<sup>3,4</sup> Ruth L. O’Gorman Tuura,<sup>5</sup>  
Josefine Meier,<sup>1,2</sup> Simon M. Ametamey,<sup>6</sup> Alfred Buck,<sup>3</sup> and Hans-Peter Landolt<sup>1,2</sup>

<sup>1</sup> *Institute of Pharmacology and Toxicology, University of Zürich, Zürich, Switzerland*

<sup>2</sup> *Sleep & Health Zürich, University Center of Competence, University of Zürich, Zürich, Switzerland*

<sup>3</sup> *Department of Nuclear Medicine, University Hospital Zurich, Zürich, Switzerland*

<sup>4</sup> *Institute for Regenerative Medicine, University of Zürich, Zürich, Switzerland*

<sup>5</sup> *Center of MR Research, Children’s University Hospital, Zürich, Switzerland*

<sup>6</sup> *Institute of Pharmaceutical Sciences, Department of Chemistry and Applied Biosciences, ETH Zurich, Zürich, Switzerland*

§ these authors contributed equally to the work

\* Present address: Neurobiology Research Unit, Copenhagen University Hospital Rigshospitalet, Copenhagen, Denmark

## Supplementary material

### Address for correspondence:

Hans-Peter Landolt, PhD

Institute of Pharmacology & Toxicology

University of Zürich

Winterthurerstrasse 190

8057 Zürich, Switzerland

Tel. +41-44-635 59 53

Fax +41-44-635 57 07

e-mail: landolt@pharma.uzh.ch

**Supplementary Table S1: Behavioral Effects of Sleep Deprivation**

|                                  | Baseline<br>(BL) | Sleep deprivation<br>(TSD) | Recovery<br>(RE) | TSD vs. BL<br><i>p</i> value | RE vs. TSD<br><i>p</i> value | RE vs. BL<br><i>p</i> value |
|----------------------------------|------------------|----------------------------|------------------|------------------------------|------------------------------|-----------------------------|
| Karolinska Sleepiness Scale      | 3.23 ± 0.19      | 4.92 ± 0.32                | 2.81 ± 0.19      | < <b>0.001</b>               | < <b>0.001</b>               | < <b>0.013</b>              |
| Tiredness Symptoms Scale         | 0.52 ± 0.12      | 1.59 ± 0.29                | 0.43 ± 0.15      | < <b>0.001</b>               | < <b>0.001</b>               | 0.609                       |
| Visual Analogue Scales of States |                  |                            |                  |                              |                              |                             |
| Mood                             | 66.55 ± 1.90     | 61.69 ± 2.20               | 70.98 ± 2.05     | < <b>0.001</b>               | < <b>0.001</b>               | < <b>0.001</b>              |
| Energy                           | 63.48 ± 1.64     | 55.07 ± 2.11               | 65.59 ± 2.22     | < <b>0.001</b>               | < <b>0.001</b>               | < 0.240                     |
| Motivation                       | 32.81 ± 2.00     | 38.14 ± 2.36               | 27.45 ± 2.13     | 0.066                        | < <b>0.001</b>               | < <b>0.048</b>              |
| Agitation                        | 41.43 ± 3.38     | 35.09 ± 2.56               | 33.88 ± 2.98     | 0.073                        | 0.561                        | <b>0.006</b>                |

Values represent means ± SEM (n = 31). *P* values refer to two-tailed, paired *t* tests. Significant differences between conditions are highlighted in bold.

## Supplementary Figure S1

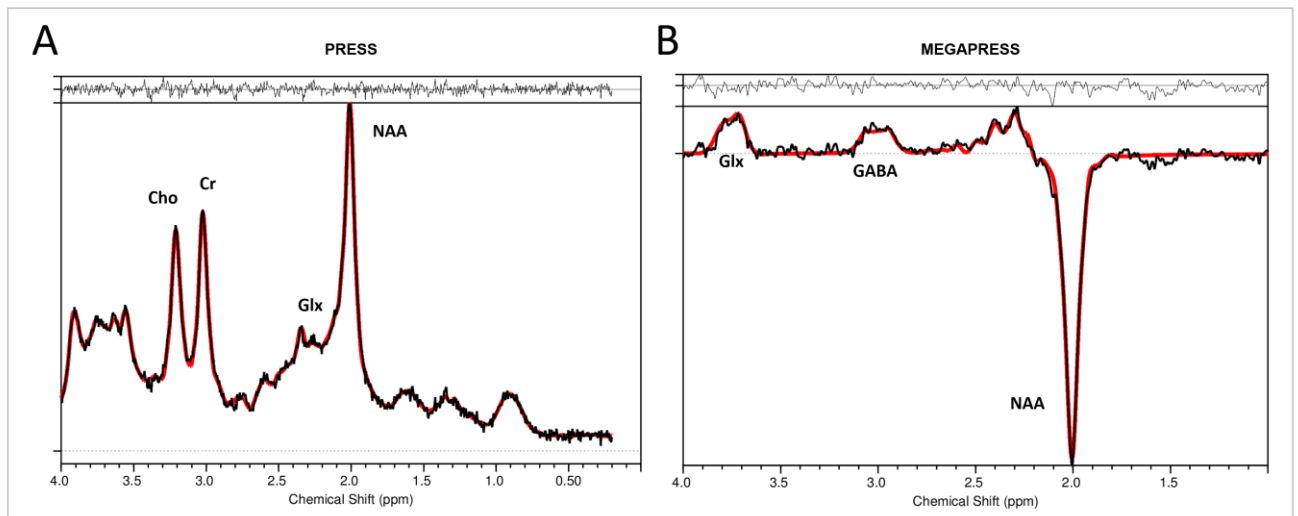

Example spectra depicting the signal detected for each resonance frequency (represented by the chemical shift in ppm). Representative spectra from the PRESS and MEGAPRESS sequences are shown in the left and right panels, respectively. Each spectrum is plotted in black with the LCMoDel fit overlaid in red. The residuals of the fit are also plotted above each spectrum.

## Supplementary Figure S2

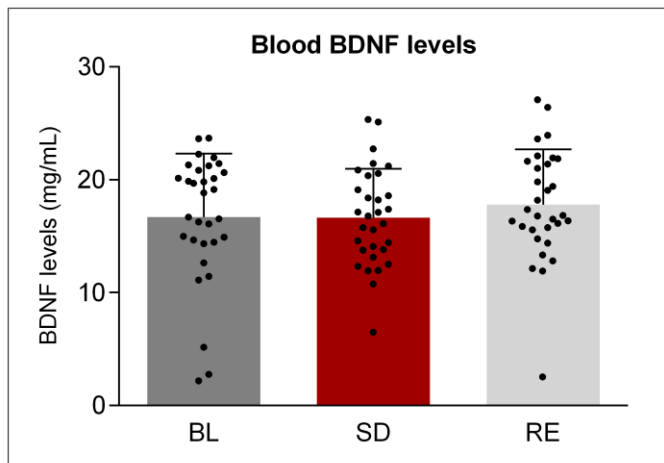

Effects of sleep deprivation and recovery sleep on circulating blood brain derived neurotrophic factor (BDNF) protein levels. Columns display blood BDNF levels in baseline (BL, dark grey), sleep deprivation (TSD, red) and recovery (RE, light grey) conditions. Data represent means + standard error of the mean (SEM) in  $n = 31$ . Black dots represent individual subjects. Mixed model ANOVA main effect of 'condition':  $F_{2,90} = 0.23$ ,  $p > 0.7$ .

**Supplementary Table S2:** Mixed-model repeated-measures ANOVA with factor ‘*condition*’.

| Variable    | Region-of-interest             | Metabolite  | NumDF | DenDF | F-value | p-value      |
|-------------|--------------------------------|-------------|-------|-------|---------|--------------|
| <b>FMRP</b> |                                |             | 2     | 44    | 3.37    | <b>0.043</b> |
| <b>BDNF</b> |                                |             | 2     | 90    | 0.23    | 0.731        |
| <b>PET</b>  | Global mean                    |             | 2     | 36    | 4.52    | <b>0.017</b> |
|             | Caudate nucleus                |             | 2     | 36    | 6.25    | <b>0.005</b> |
|             | Putamen                        |             | 2     | 36    | 4.61    | <b>0.017</b> |
|             | Ventral striatum               |             | 2     | 36    | 0.86    | 0.431        |
|             | Amygdala                       |             | 2     | 36    | 5.54    | <b>0.008</b> |
|             | dIPFC                          |             | 2     | 36    | 4.15    | <b>0.024</b> |
|             | Orbitofrontal cortex           |             | 2     | 36    | 0.10    | 0.902        |
|             | Medial superior frontal cortex |             | 2     | 36    | 4.57    | <b>0.017</b> |
|             | Anterior cingulate cortex      |             | 2     | 36    | 4.89    | <b>0.013</b> |
|             | Parietal cortex                |             | 2     | 36    | 6.85    | <b>0.003</b> |
|             | Inferior parietal cortex       |             | 2     | 36    | 7.18    | <b>0.002</b> |
|             | Precuneus                      |             | 2     | 36    | 6.96    | <b>0.003</b> |
|             | Medial temporal lobe           |             | 2     | 36    | 3.18    | 0.054        |
|             | Parahippocampal gyrus          |             | 2     | 36    | 0.82    | 0.448        |
|             | Hippocampus                    |             | 2     | 36    | 5.47    | <b>0.008</b> |
|             | Insula                         |             | 2     | 36    | 7.42    | <b>0.002</b> |
| <b>MRS</b>  | Basal ganglia                  | Glutamate   | 2     | 37    | 4.83    | <b>0.014</b> |
|             |                                | GLX         | 2     | 37    | 6.32    | <b>0.004</b> |
|             |                                | GABA        | 2     | 37    | 0.63    | 0.754        |
|             |                                | NAA         | 2     | 37    | 0.68    | 0.515        |
|             |                                | Choline     | 2     | 37    | 0.83    | 0.444        |
|             |                                | Glutathione | 2     | 37    | 1.41    | 0.258        |
|             | dIPFC                          | Glutamate   | 2     | 37    | 0.08    | 0.924        |
|             |                                | GLX         | 2     | 37    | 1.61    | 0.209        |
|             |                                | GABA        | 2     | 37    | 0.48    | 0.624        |
|             |                                | NAA         | 2     | 37    | 0.65    | 0.526        |
|             |                                | Choline     | 2     | 37    | 0.74    | 0.483        |
|             |                                | Glutathione | 2     | 37    | 0.04    | 0.957        |

Results of mixed-model repeated-measures ANOVA with within-subject factor ‘*condition*’ (BL, TSD, RE). Significant p-values are highlighted in bold. FMRP: fragile-x mental retardation protein; BDNF: brain-derived neurotrophic factor; PET: positron emission

tomography; MRS: magnetic resonance spectroscopy. dlPFC: dorsolateral prefrontal cortex;  
GLX: glutamate-to-glutamine ratio; GABA:  $\gamma$ -aminobutyric acid; NAA: N-acetyl-aspartate;

**Supplementary Table S3:** Post-hoc comparisons of blood protein levels, PET and MRS variables to localize differences between conditions.

| Variable    | Region-of-interest             | Metabolite | DF | Corrected p-value |                    |              |                    |              |                    |
|-------------|--------------------------------|------------|----|-------------------|--------------------|--------------|--------------------|--------------|--------------------|
|             |                                |            |    | TSD vs. BL        |                    | RE vs. TSD   |                    | RE vs. BL    |                    |
|             |                                |            |    | Tukey-Kramer      | Benjamini-Hochberg | Tukey-Kramer | Benjamini-Hochberg | Tukey-Kramer | Benjamini-Hochberg |
| <b>FMRP</b> |                                |            | 44 | <b>0.035</b>      |                    | 0.620        |                    | 0.259        |                    |
| <b>BDNF</b> |                                |            | 90 | 0.975             |                    | 0.999        |                    | 0.984        |                    |
| <b>PET</b>  | Global Mean                    |            | 36 | <b>0.044</b>      |                    | <b>0.004</b> |                    | 0.465        |                    |
|             | Caudate nucleus                |            | 36 |                   | <b>0.027</b>       |              | <b>0.027</b>       |              | 0.657              |
|             | Putamen                        |            | 36 |                   | 0.120              |              | <b>0.027</b>       |              | 0.384              |
|             | Ventral striatum               |            | 36 |                   | 0.383              |              | 0.406              |              | 0.709              |
|             | Amygdala                       |            | 36 |                   | 0.057              |              | <b>0.027</b>       |              | 0.523              |
|             | dIPFC                          |            | 36 |                   | <b>0.031</b>       |              | 0.231              |              | 0.406              |
|             | Orbitofrontal cortex           |            | 36 |                   | 0.657              |              | 0.657              |              | 0.724              |
|             | Medial superior frontal cortex |            | 36 |                   | <b>0.031</b>       |              | 0.092              |              | 0.657              |
|             | Anterior cingulate cortex      |            | 36 |                   | 0.357              |              | <b>0.027</b>       |              | 0.131              |
|             | Parietal cortex                |            | 36 |                   | <b>0.027</b>       |              | <b>0.024</b>       |              | 0.614              |
|             | Inferior parietal cortex       |            | 36 |                   | 0.053              |              | <b>0.020</b>       |              | 0.350              |
|             | Precuneus                      |            | 36 |                   | 0.071              |              | <b>0.020</b>       |              | 0.283              |
|             | Medial temporal lobe           |            | 36 |                   | 0.100              |              | 0.100              |              | 0.687              |
|             | Parahippocampal gyrus          |            | 36 |                   | 0.657              |              | 0.366              |              | 0.485              |
|             | Hippocampus                    |            | 36 |                   | 0.092              |              | <b>0.027</b>       |              | 0.384              |
|             | Insula                         |            | 36 |                   | 0.101              |              | <b>0.020</b>       |              | 0.142              |
| <b>MRS</b>  | Basal ganglia                  | Glutamate  | 37 |                   | 0.057              |              | 0.298              |              | 0.503              |

|       |             |    |              |       |       |
|-------|-------------|----|--------------|-------|-------|
|       | GLX         | 37 | <b>0.031</b> | 0.139 | 0.464 |
|       | GABA        | 37 | 0.862        | 0.969 | 0.865 |
|       | NAA         | 37 | 0.621        | 0.947 | 0.538 |
|       | Choline     | 37 | 0.712        | 0.865 | 0.865 |
|       | Glutathione | 37 | 0.902        | 0.496 | 0.448 |
| dIPFC | Glutamate   | 37 | 0.862        | 0.865 | 0.902 |
|       | GLX         | 37 | 0.487        | 0.290 | 0.865 |
|       | GABA        | 37 | 0.816        | 0.503 | 0.865 |
|       | NAA         | 37 | 0.865        | 0.902 | 0.869 |
|       | Choline     | 37 | 0.865        | 0.902 | 0.862 |
|       | Glutathione | 37 | 0.902        | 0.865 | 0.862 |

Results of post-hoc analyses of blood protein levels, PET and MRS data. Based upon *a priori* hypotheses, p-values to localize condition-dependent difference in FMRP and BDNF levels and global mGluR5 availability were Tukey-Kramer corrected (conditions: BL, TSD, RE). The secondary analyses including 15 pre-defined regions-of-interest (see: Hefti et al., Biol Psychiatry 73, 161-168, 2013) across BL, TSD and RE conditions and 6 MRS metabolites in two brain regions (basal ganglia and dIPFC) across BL, TSD and RE conditions, were corrected by the Benjamini-Hochberg procedure to reduce the false discovery rate.

FMRP: fragile-x mental retardation protein; BDNF: brain-derived neurotrophic factor; PET: positron emission tomography; MRS: magnetic resonance spectroscopy; DF: degrees of freedom; BL: baseline; TSD: total sleep deprivation; RE: recovery; dIPFC: dorsolateral prefrontal cortex; GLX: glutamate-to-glutamine ratio; GABA:  $\gamma$ -aminobutyric acid; NAA: N-acetyl-aspartate. Significant p-values are highlighted in bold.
